# Supplementary material
Source: Elsevier journal article supplement (https://www.sciencedirect.com/science/article/pii/S0101328916301408)
Supplement: mmc1 [file S0101328916301408:mmc1.docx]

SUPLEMENTOS

SUPLEMENTO 1. Modelo de sessão de treino realizada.

| - Exercício 01 - 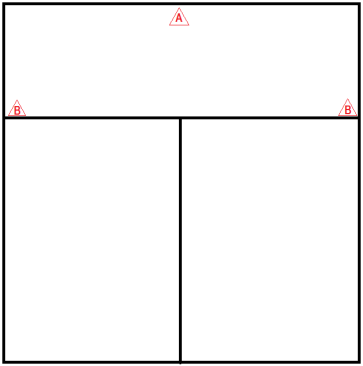 | - Defesa duas paredes + deslocamento até o cone correspondente (10 minutos)   - Fundo e lateral: deslocar-se até o cone A  - Lateral e fundo: deslocar-se até o cone B (do lado que estiver treinando)  *Treinador na diagonal |
| --- | --- |
| - Exercício 02 - 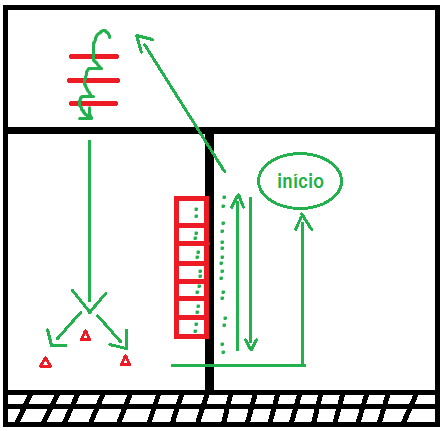 | - Escadinha ida e volta + 3 saltos + voleio direita + voleio esquerda (10 minutos) *Treinador na paralela |
| - Exercício 03 - 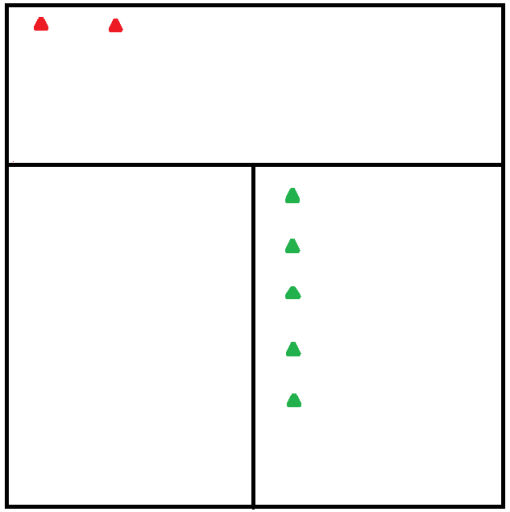 | - Tempo de reação + lob + voleio + zigue-zague (10 minutos)   - Jogador se posiciona de frente para a parede do fundo entre os cones vermelhos. O treinador dará o sinal sonoro e lançará a bola. O jogador deverá virar-se e realizar um lob, deslocar-se até a rede, volear a bola que o treinador lançará e fazer o zigue-zague nos cones verdes, retornando à posição inicial entre os cones vermelhos. *Treinador na paralela |
| - Exercício 04 - 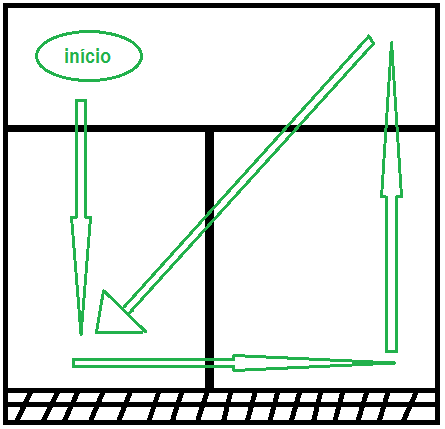 | - Saída de parede (alternar direita e esquerda) + corrida para a rede + deslocamento lateral para a esquerda + deslocamento de costas para o fundo de quadra + tiro em diagonal para a rede na direita (5 minutos) *Treinador na paralela |
| Exercício 05  O jogador se posiciona na rede. Primeiro lançamento: smash de contenção. Segundo lançamento: smash de definição. Terceiro lançamento: jogador deixa passar a bola e realiza a saída de parede, continuando um ponto na diagonal | - Smash de contenção + smash de definição + saída de parede e continuação do ponto (10 minutos)   *Treinador na diagonal |
